# Supplementary material
Source: PubMed Central journal article supplement (PMC4245039)
Supplement: supp_ddu387_ddu387supp.pdf [file supp_ddu387_ddu387supp.pdf]

## Supplementary Notes

**Risk for ACPA-positive rheumatoid arthritis is driven by shared HLA amino acid polymorphisms in Asian and European populations.**

Yukinori Okada, Kwangwoo Kim, Buhm Han, Nisha E Pillai, Rick T-H Ong, Woei-Yuh Saw, Ma Luo, Lei Jiang, Jian Yin, So-Young Bang, Hye-Soon Lee, Matthew A. Brown, Sang-Cheol Bae, Huji Xu, Yik-Ying Teo, Paul IW de Bakker, Soumya Raychaudhuri\*.

\*Corresponding author:

Soumya Raychaudhuri, MD, PhD ([soumya@broadinstitute.org](mailto:soumya@broadinstitute.org))

**Table S1. Reference panels for HLA variant imputation.**

| Reference panel        | No. subjects | Populations        | Cohorts                                                                                                                          |
|------------------------|--------------|--------------------|----------------------------------------------------------------------------------------------------------------------------------|
| Pan-Asian panel        | 530          | Asians             | Singapore Chinese ( $n=91$ ), Chinese ( $n=111$ ), Indian ( $n=119$ ), Malaysian ( $n=120$ ), HapMap Phase II JPT+CHB ( $n=89$ ) |
| European panel         | 120          | Europeans          | HapMap CEU founders                                                                                                              |
| European panel         | 5,225        | Europeans          | T1DGC consortium                                                                                                                 |
| Asian & European panel | 5,755        | Asians & Europeans | Combined panels of Pan-Asians and Europeans (T1DGC)                                                                              |

**Table S2. Characteristics of the datasets enrolled in the study.**

| Population  | Study design | Genotyping Platform                        | No. subjects |          | References                |
|-------------|--------------|--------------------------------------------|--------------|----------|---------------------------|
|             |              |                                            | RA cases     | Controls |                           |
| China       | GWAS         | Affymetrix Genome-wide Human SNP Array 6.0 | 466          | 873      | Jiang L et al. 2014       |
| South Korea | GWAS         | Illumina Human 660W-Quad BeadChip          | 799          | 751      | Freudenberg J et al. 2011 |
| South Korea | ImmunoChip   | Illumina HumanHap550 BeadChip              | 1,517        | 2,691    | Kim K et al. 2014         |
| Total       | -            | -                                          | 2,782        | 4,315    | -                         |

**Table S3. Associations of HLA amino acid residues with risk of RA in Asians and Europeans.**

| HLA              | Amino acid position | Residue | Asian                  |         |                 | European               |         |                 | $F_{ST}$ | Imputation quality score ( $r^2$ by SNP2HAP) |             |                   |
|------------------|---------------------|---------|------------------------|---------|-----------------|------------------------|---------|-----------------|----------|----------------------------------------------|-------------|-------------------|
|                  |                     |         | Frequency <sup>a</sup> |         | OR <sup>b</sup> | Frequency <sup>a</sup> |         | OR <sup>b</sup> |          | in Asian RA studies                          |             |                   |
|                  |                     |         | RA case                | Control |                 | RA case                | Control |                 |          | Chinese GWAS                                 | Korean GWAS | Korean Immunochip |
| HLA-DR $\beta$ 1 | 11                  | Val     | 0.346                  | 0.192   | 2.16            | 0.470                  | 0.182   | 3.78            | 0.000    | 0.96                                         | 0.99        | 1.00              |
|                  |                     | Asp     | 0.150                  | 0.108   | 1.48            | 0.013                  | 0.011   | 1.01            | 0.042    | 0.96                                         | 0.98        | 0.99              |
|                  |                     | Leu     | 0.068                  | 0.056   | 1.22            | 0.145                  | 0.113   | 1.30            | 0.011    | 1.00                                         | 1.00        | 1.00              |
|                  |                     | Pro     | 0.105                  | 0.135   | 0.78            | 0.104                  | 0.155   | 0.63            | 0.001    | 1.00                                         | 0.97        | 1.00              |
|                  |                     | Gly     | 0.048                  | 0.075   | 0.69            | 0.064                  | 0.133   | 0.49            | 0.009    | 0.97                                         | 0.99        | 0.99              |
|                  |                     | Ser     | 0.282                  | 0.433   | 0.50            | 0.205                  | 0.406   | 0.38            | 0.001    | 0.99                                         | 0.99        | 1.00              |
|                  | 13                  | His     | 0.308                  | 0.175   | 2.03            | 0.449                  | 0.174   | 3.71            | 0.000    | 0.96                                         | 1.00        | 1.00              |
|                  |                     | Phe     | 0.257                  | 0.181   | 1.57            | 0.178                  | 0.132   | 1.38            | 0.005    | 0.96                                         | 0.99        | 1.00              |
|                  |                     | Arg     | 0.105                  | 0.135   | 0.78            | 0.104                  | 0.155   | 0.62            | 0.001    | 1.00                                         | 0.97        | 1.00              |
|                  |                     | Tyr     | 0.048                  | 0.075   | 0.69            | 0.064                  | 0.133   | 0.49            | 0.009    | 0.97                                         | 0.99        | 0.98              |
|                  |                     | Gly     | 0.160                  | 0.217   | 0.67            | 0.028                  | 0.049   | 0.50            | 0.062    | 0.91                                         | 0.88        | 0.87              |
|                  |                     | Ser     | 0.121                  | 0.216   | 0.49            | 0.176                  | 0.357   | 0.40            | 0.024    | 0.89                                         | 0.88        | 0.88              |
|                  | 57                  | Ser     | 0.285                  | 0.161   | 1.96            | 0.028                  | 0.038   | 0.69            | 0.042    | 0.96                                         | 0.97        | 0.99              |
|                  |                     | Val     | 0.278                  | 0.276   | 1.06            | 0.091                  | 0.161   | 0.54            | 0.020    | 0.95                                         | 0.95        | 0.96              |
|                  |                     | Asp     | 0.411                  | 0.510   | 0.66            | 0.869                  | 0.776   | 1.88            | 0.077    | 0.94                                         | 0.94        | 0.95              |
|                  |                     | Ala     | 0.027                  | 0.053   | 0.50            | 0.012                  | 0.025   | 0.50            | 0.005    | 0.84                                         | 0.81        | 0.86              |
|                  | 71                  | Arg     | 0.820                  | 0.744   | 1.56            | 0.458                  | 0.487   | 0.97            | 0.070    | 0.96                                         | 0.99        | 0.99              |
|                  |                     | Lys     | 0.036                  | 0.035   | 1.10            | 0.397                  | 0.242   | 2.01            | 0.090    | 0.93                                         | 0.93        | 0.97              |
|                  |                     | Ala     | 0.095                  | 0.122   | 0.77            | 0.092                  | 0.142   | 0.59            | 0.001    | 0.98                                         | 1.00        | 0.99              |
|                  |                     | Glu     | 0.049                  | 0.099   | 0.45            | 0.052                  | 0.129   | 0.32            | 0.002    | 0.95                                         | 0.99        | 1.00              |
| 74               | Ala                 | 0.628   | 0.558                  | 1.34    | 0.801           | 0.664                  | 2.10    | 0.012           | 0.94     | 0.96                                         | 0.95        |                   |
|                  | Glu                 | 0.241   | 0.247                  | 0.96    | 0.039           | 0.047                  | 0.76    | 0.080           | 0.91     | 0.95                                         | 0.94        |                   |
|                  | Gln                 | 0.049   | 0.076                  | 0.70    | 0.064           | 0.133                  | 0.49    | 0.009           | 0.97     | 0.99                                         | 1.00        |                   |
|                  | Leu                 | 0.068   | 0.094                  | 0.66    | 0.013           | 0.029                  | 0.41    | 0.019           | 0.97     | 0.99                                         | 0.99        |                   |
|                  | Arg                 | 0.014   | 0.026                  | 0.54    | 0.082           | 0.128                  | 0.59    | 0.037           | 1.00     | 0.99                                         | 0.99        |                   |

**Table S3. (Continued)**

|                  |   |     |       |       |      |       |       |      |       |      |      |      |
|------------------|---|-----|-------|-------|------|-------|-------|------|-------|------|------|------|
| B                | 9 | Asp | 0.006 | 0.003 | 4.21 | 0.130 | 0.118 | 2.14 | 0.058 | 1.00 | 1.00 | 1.00 |
|                  |   | His | 0.204 | 0.174 | 1.06 | 0.227 | 0.212 | 0.95 | 0.002 | 0.98 | 0.99 | 1.00 |
|                  |   | Tyr | 0.790 | 0.822 | 0.91 | 0.643 | 0.670 | 0.82 | 0.031 | 0.98 | 0.99 | 1.00 |
| HLA-DP $\beta$ 1 | 9 | Phe | 0.862 | 0.823 | 1.26 | 0.799 | 0.728 | 1.39 | 0.013 | 0.85 | 0.87 | 0.98 |
|                  |   | His | 0.050 | 0.068 | 0.93 | 0.035 | 0.049 | 0.89 | 0.002 | 0.89 | 0.93 | 0.99 |
|                  |   | Tyr | 0.088 | 0.110 | 0.76 | 0.165 | 0.223 | 0.70 | 0.023 | 0.81 | 0.84 | 0.97 |

<sup>a</sup> Unadjusted allele frequencies of the HLA amino acid residues and the haplotypes. Haplotypes with frequency  $\geq 0.005$  in controls are indicated.

<sup>b</sup> Associations in HLA-B and HLA-DP $\beta$ 1 were conditioned on the HLA-DR $\beta$ 1 amino acid residues.

RA; rheumatoid arthritis, OR; odds ratio.

**Table S4. Associations of HLA amino acid haplotypes with risk of RA in Asians (based on the model from the current Asian study).**

| HLA-DRβ1 amino acid position |     |     |     | Frequency <sup>a</sup> |         | RA risk association |          |
|------------------------------|-----|-----|-----|------------------------|---------|---------------------|----------|
| 11                           | 13  | 57  | 74  | RA case                | Control | OR (95%CI)          | <i>P</i> |
| Val                          | His | Asp | Ala | 0.025                  | 0.011   | 3.42 (2.53-4.63)    | 1.2E-15  |
| Val                          | His | Ser | Ala | 0.226                  | 0.090   | 2.97 (2.59-3.41)    | 3.3E-54  |
| Val                          | Phe | Asp | Ala | 0.038                  | 0.017   | 2.77 (2.18-3.52)    | 1.1E-16  |
| Asp                          | Phe | Val | Glu | 0.149                  | 0.108   | 1.77 (1.54-2.04)    | 3.9E-15  |
| Leu                          | Phe | Asp | Ala | 0.068                  | 0.056   | 1.48 (1.24-1.76)    | 1.0E-05  |
| Ser                          | Gly | Val | Ala | 0.080                  | 0.093   | 1.10 (0.94-1.30)    | 0.23     |
| Pro                          | Arg | Asp | Ala | 0.105                  | 0.135   | 1.00 (1.00-1.00)    | 1.00     |
| Ser                          | Gly | Ser | Leu | 0.058                  | 0.071   | 0.97 (0.82-1.16)    | 0.74     |
| Val                          | His | Asp | Glu | 0.057                  | 0.074   | 0.93 (0.79-1.11)    | 0.43     |
| Gly                          | Tyr | Val | Gln | 0.048                  | 0.075   | 0.88 (0.73-1.05)    | 0.16     |
| Ser                          | Ser | Ala | Glu | 0.013                  | 0.020   | 0.78 (0.57-1.06)    | 0.107    |
| Ser                          | Ser | Asp | Glu | 0.008                  | 0.012   | 0.74 (0.51-1.09)    | 0.13     |
| Ser                          | Ser | Asp | Arg | 0.013                  | 0.026   | 0.69 (0.52-0.93)    | 0.015    |
| Ser                          | Ser | Asp | Ala | 0.085                  | 0.156   | 0.67 (0.57-0.77)    | 1.1E-07  |
| Ser                          | Gly | Ala | Glu | 0.014                  | 0.033   | 0.55 (0.41-0.72)    | 1.9E-05  |
| Ser                          | Gly | Asp | Leu | 0.008                  | 0.022   | 0.42 (0.30-0.59)    | 9.4E-07  |

<sup>a</sup> Unadjusted allele frequencies of the HLA amino acid residues and the haplotypes. Haplotypes with frequency  $\geq 0.005$  in controls are indicated. RA; rheumatoid arthritis, OR; odds ratio.

**Figure S1. Imputation accuracy of the classical HLA alleles in Asians.**

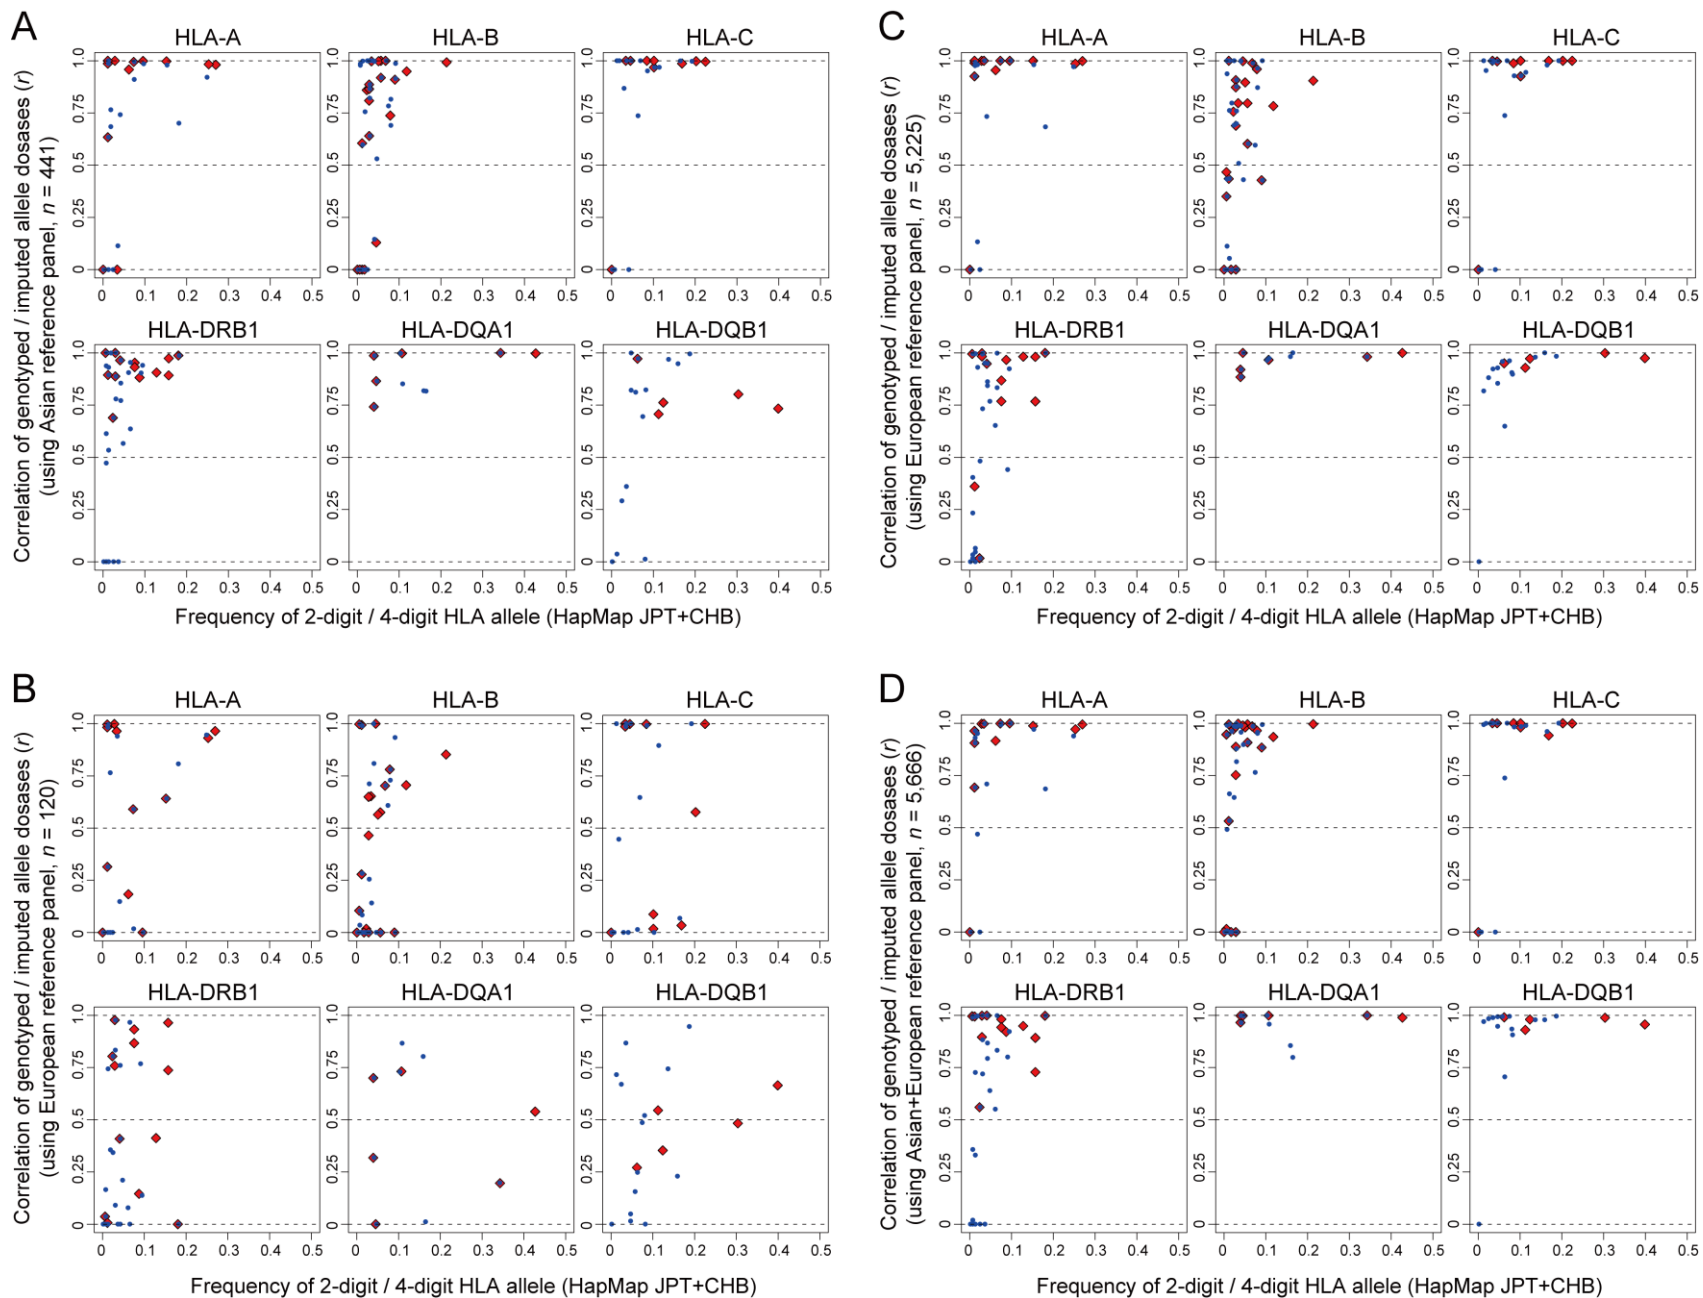

We empirically compared correlation of imputed and genotyped classical HLA allele dosages, using HapMap Phase II JPT+CHB dataset ( $n = 89$ ). Each panel represents co-plots of frequencies and correlation coefficients ( $r$ ) between imputed and genotyped 2-digit and 4-digit alleles of the 6 HLA genes (*HLA-A*, *B*, *C*, *DRB1*, *DQA1*, and *DQB1*). We conducted three sets of imputation using different reference panels; **(A)** Asian reference panel other than HapMap subjects ( $n = 441$ ), **(B)** European reference panel from HapMap CEU founder populations ( $n = 120$ ), **(C)** European reference panel from Type 1 Diabetes Genetics Consortium (T1DGC;  $n = 5,225$ ), and **(D)** combined Asian and European reference panel (T1DGC for Europeans;  $n = 5,666$ )



**Figure S2. Comparison of haplotype ORs of RA risk HLA amino acid polymorphisms between Asians and Europeans (based on the model from the current Asian study).**

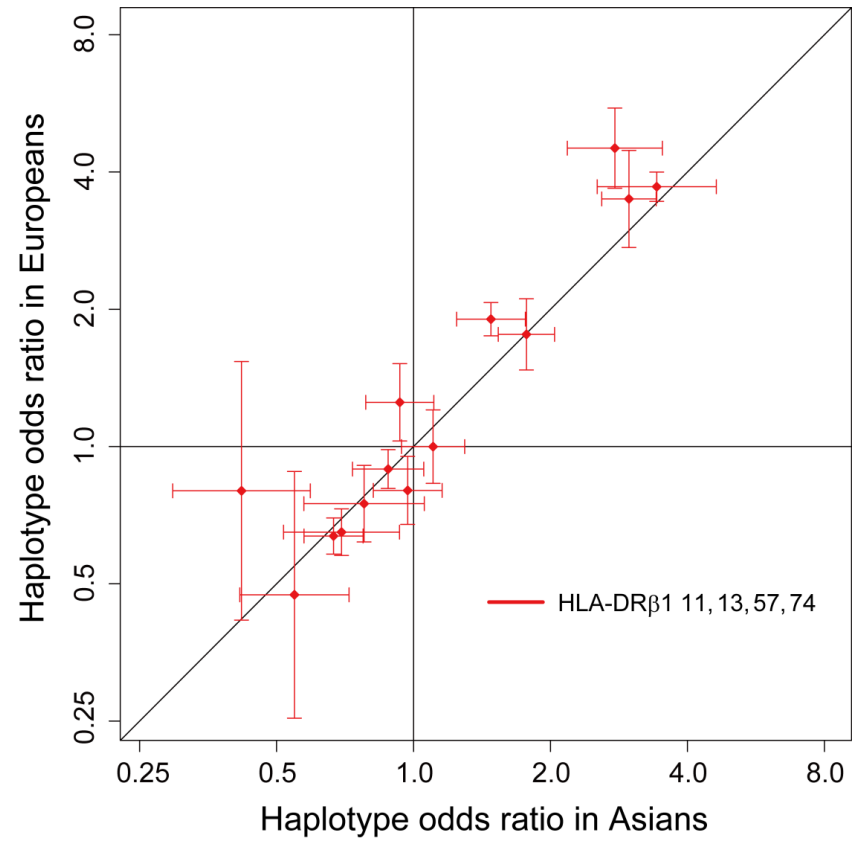

Odds ratios of the haplotypes consisting of the risk HLA amino acid polymorphisms based on the Asian model (HLA-DRβ1 amino acid positions 11, 13, 57, and 74) and their 95% confidence intervals are plotted based on those in Asians (*x*-axis) and Europeans (*y*-axis).
